# Supplementary material for: Groundwater springs in the German Wadden Sea tidal flat: A fast-track terrestrial transfer route for nutrients and dissolved organic matter
Source: Frontiers journal article supplement (doi:10.3389/fmars.2023.1128855), 2023-02-21
Supplement: Data_Sheet_1.docx [file Data_Sheet_1.docx]

Supplementary Material

**Groundwater springs in the German Wadden Sea tidal flat: A fast-track terrestrial transfer route for nutrients and dissolved organic matter (DOM)**

Roger Carvalho da Silva1, Michael Seidel1, Thorsten Dittmar1,2, Hannelore Waska1,*

1Institute for Chemistry and Biology of the Marine Environment (ICBM), Carl von Ossietzky University of Oldenburg, 26129 Oldenburg, Germany

2 Helmholtz Institute for Functional Marine Biodiversity at the University of Oldenburg
(HIFMB), 26129 Oldenburg, Germany

***Correspondence:**Hannelore Waska
hannelore.waska@uol.de

**Contents: 3 Tables, 3 Figures**

**Supplementary Table 1:** Distribution of physico-chemical parameters through the campaigns in the different locations. Numbers in brackets are sample numbers (n). b.d. = below detection limit. For each campaign, maximum values are in bold, and minimum values are italic. NA= not sampled.

| **Campaign** | **Salinity** | **Temperature (°C)** | **O2 (µM)** | **FDOM (RFU)** | **Fe(II) (µM)** | **TDN (µM)** | **DOC (µM)** |
| --- | --- | --- | --- | --- | --- | --- | --- |
| **June 2018** |  |  |  |  |  |  |  |
| - Nearshore springs (0) | NA | NA | NA | NA | NA | NA | NA |
| - Middle springs (0) | NA | NA | NA | NA | NA | NA | NA |
| - Offshore springs (4) | 0.5±0.1 | 14.3±0.5 | 180.7±64.6 | 10.3±8.7 | 0 | 109.2±25.1 | 54.1±14.9 |
| **August 2018** |  |  |  |  |  |  |  |
| - Nearshore springs (0) | NA | NA | NA | NA | NA | NA | NA |
| - Middle springs (0) | NA | NA | NA | NA | NA | NA | NA |
| - Offshore springs (9) | 1±1.7 | 21.7±3.3 | 55.8±49.9 | 9.7±11.9 | 1.8±5.5 | 88.7±100.5 | 69.8±49.6 |
| **February 2019** |  |  |  |  |  |  |  |
| - Nearshore springs (5) | 1.4±0.6 | **10.7±0.5** | 68.4±41.1 | 35.9±10.9 | b.d. | 272.2±181.6 | 119.9±15.4 |
| - Middle springs (11) | 0.5±0.8 | 9.6±0.5 | 158±100.7 | 16.3±25.3 | b.d. | **452.7±310** | 71.4±48.2 |
| - Offshore springs (18) | *0.2±0.2* | 8.7±1.3 | 112.8±58.6 | 6.5±5.3 | b.d. | 406.1±258.8 | *52.8±11.5* |
| Beach porewater (3) | 2.2±0.6 | 7.9±1 | *8.5±3.4* | 227.7±193.8 | **30.4±42.4** | 111±105 | 573±371.2 |
| Tidal porewater (13) | 1.1±3.5 | 8.4±1.4 | 130.4±79.1 | *7.9±14.9* | *1.5±5.5* | 237.2±142.5 | 57.7±28.5 |
| Lake (2) | 0 | *5.4* | 373±0.2 | **280.1±5.2** | b.d. | *48.8±5.5* | **1328.3±4.6** |
| Seawater (4) | **22.1±5.8** | 10.5±1.3 | **374.8±83.5** | 89.2±23.9 | b.d. | 56.5±14.8 | 296±56.7 |
| **March 2019** |  |  |  |  |  |  |  |
| Weser (n3) | **19.6±12.1** | *6.5±0.1* | NA | *117.2±109.8* | NA | *134.2±109.2* | *304.4±202.1* |
| Elbe (n3) | *9.8±10* | **7.1±0.1** | NA | **118.1±45.7** | NA | **236.9±93.5** | **350.5±104.6** |
| **November 2019** |  |  |  |  |  |  |  |
| - Nearshore springs (25) | 1.2±0.5 | 8.5±0.7 | 149.6±46.4 | 52.2±44.2 | b.d | 192±141.6 | 100.5±50.1 |
| - Middle springs (12) | 0.4±0.2 | 8.3±1 | 183.2±29.1 | *8.3±4.9* | b.d | 369.6±65.3 | *36.6±15.9* |
| - Offshore springs (25) | 0.8±0.6 | 8.3±0.9 | 170.2±44.5 | 22.1±32.5 | b.d | 577.9±327.9 | 55.8±41 |
| Beach porewater (2) | 1.2±0.7 | 9.2±0.4 | *51.8±4.8* | 198.6±22.1 | 3.4±4.8 | *24.5±1.9* | 330.3±157.4 |
| Lake (1) | 0 | 7.3 | 140.8±0 | 285.4 | b.d | 48.5 | **1464.8** |
| Seawater (2) | **17±1.5** | 7.7±0.5 | 384.1±49 | 145.2±79.9 | b.d. | 76.1±21.6 | 379.7±7.2 |
| Sahlenburg Well (1) | *0.2* | **10.4** | 71.8 | 113.8 | b.d. | **891.8** | 255.8 |
| Spieka Well (1/2) | *0.2* | 10.3 | 89.0 | **421.8** | b.d. | 16.6±0.1 | 195.2±5.6 |
| Water channel (1) | *0.2* | *4.4* | **404.8±0** | 292.1 | b.d. | 49.2 | 517.0 |
| **July 2020** |  |  |  |  |  |  |  |
| - Nearshore springs (21) | 2.3±3.8 | *17.1±2.6* | 132.6±60.4 | 42.4±26.9 | b.d. | 158.6±101.6 | 129.5±74.5 |
| - Middle springs (23) | 1.4±2.8 | 18.8±2.3 | 130.6±72 | 43.7±50.2 | *7.0±20.7* | 318±398.6 | 131.5±129.6 |
| - Offshore springs (21) | 1.3±2.9 | 19.0±2.0 | 145.7±60 | *12.8±21.2* | b.d. | **476.9±376.2** | *60.3±67* |
| Beach porewater (2) | 2.0±1.0 | 20.0±1.4 | 74.5±14.5 | **745.6±943** | **15.5±21.9** | 223±192.3 | 1256.7±287 |
| Tidal porewater (5) | 6.9±8.7 | 22.1±3.1 | 109±108 | 200.3±190.9 | 9±15.4 | 74.5±19.9 | 551.2±444.9 |
| Lake (1) | *0.1* | **22.0** | *30.4* | 464.2 | 7.1 | 66.7 | **2021.5** |
| Seawater (2) | **24.7±1.2** | 19.3±0.5 | **276.3±2.4** | 113.2±20 | b.d. | *37±8.4* | 358.8±64.2 |

**Supplementary Table 2:** Distribution of molecular DOM parameters through the campaigns in the different locations. For each campaign, maximum values are in bold, and minimum values are italic. NA= not sampled.

| **Campaign** | ***m/z*** | **H/C** | **O/C** | **AImod** | **N/C** | **IDEG** | **ITerr** |
| --- | --- | --- | --- | --- | --- | --- | --- |
| **June 2018** |  |  |  |  |  |  |  |
| - Nearshore springs (0) | NA | NA | NA | NA | NA | NA | NA |
| - Middle springs (0) | NA | NA | NA | NA | NA | NA | NA |
| - Offshore springs (4) | 381.1±5.9 | 1.293±0.041 | 0.392±0.018 | 0.265±0.012 | 0.005±0.001 | 0.806±0.019 | 0.340±0.014 |
| **August 2018** |  |  |  |  |  |  |  |
| - Nearshore springs (0) | NA | NA | NA | NA | NA | NA | NA |
| - Middle springs (0) | NA | NA | NA | NA | NA | NA | NA |
| - Offshore springs (9) | 382.5±14.4 | 1.284±0.023 | 0.380±0.027 | 0.273±0.017 | 0.007±0.004 | 0.833±0.039 | 0.380±0.082 |
| **February 2019** |  |  |  |  |  |  |  |
| - Nearshore springs (5) | 381.9±6.3 | 1.242±0.019 | 0.400±0.008 | 0.288±0.005 | 0.012±0.002 | 0.838±0.015 | 0.339±0.013 |
| - Middle springs (11) | 389±8.5 | 1.281±0.038 | 0.397±0.012 | 0.265±0.018 | 0.008±0.004 | **0.847±0.021** | 0.308±0.028 |
| - Offshore springs (18) | 387.8±5.6 | 1.292±0.015 | *0.392±0.006* | 0.262±0.007 | *0.006±0.002* | 0.843±0.018 | 0.307±0.025 |
| Beach porewater (3) | 379.6±8.8 | *1.133±0.078* | **0.427±0.019** | **0.346±0.045** | 0.011±0.003 | 0.829±0.051 | 0.483±0.090 |
| Tidal porewater (13) | **391.3±11** | **1.297±0.031** | 0.396±0.012 | *0.258±0.018* | *0.006±0.003* | 0.844±0.040 | *0.294±0.041* |
| Lake (2) | 371.6±1.4 | 1.219±0.003 | 0.422±0.004 | 0.297±0.0002 | 0.007±0.0001 | *0.590±0.008* | **0.513±0.008** |
| Seawater (4) | *365.6±12.3* | 1.221±0.027 | 0.417±0.023 | 0.296±0.007 | **0.020±0.002** | 0.751±0.03 | 0.389±0.042 |
| **March 2019** |  |  |  |  |  |  |  |
| Weser (n3) | **382.8±3.0** | *1.168±0.031* | **0.457±0.002** | **0.308±0.021** | **0.018±0.003** | **0.581±0.007** | *0.314±0.064* |
| Elbe (n3) | *377.7±4.3* | **1.172±0.009** | *0.455±0.006* | *0.306±0.008* | *0.015±0.002* | *0.552±0.012* | **0.331±0.032** |
| **November 2019** |  |  |  |  |  |  |  |
| - Nearshore springs (25) | 379.2±13.7 | 1.261±0.035 | 0.392±0.008 | 0.283±0.024 | 0.010±0.003 | 0.812±0.034 | 0.357±0.077 |
| - Middle springs (12) | **396.6±6.6** | **1.288±0.014** | 0.398±0.010 | *0.259±0.008* | *0.007±0.001* | **0.853±0.026** | *0.278±0.025* |
| - Offshore springs (25) | 390.2±9.6 | 1.274±0.019 | 0.396±0.011 | 0.269±0.012 | 0.009±0.002 | 0.847±0.023 | 0.305±0.041 |
| Beach porewater (2) | 362.6±2.5 | 1.217±0.008 | 0.384±0.0001 | 0.320±0.005 | 0.008±0.002 | 0.770±0.039 | 0.520±0.039 |
| Lake (1) | *356.5* | 1.263 | 0.398 | 0.284 | 0.008 | *0.530* | 0.526 |
| Seawater (2) | 370.1±10.3 | 1.190±0.041 | 0.432±0.002 | 0.307±0.029 | **0.021±0.002** | 0.789±0.012 | 0.387±0.076 |
| Sahlenburg Well (1) | 389.3 | 1.187 | **0.438** | 0.302 | 0.019 | 0.872 | 0.374 |
| Spieka Well (2) | 352.9±2.3 | *1.080±0.003* | *0.362±0.004* | **0.407±0.004** | 0.008±0.001 | 0.84±0.004 | **0.632±0.013** |
| Water channel (1) | 386.6 | 1.268 | 0.395 | 0.275 | 0.010 | 0.817 | 0.320 |
| **July 2020** |  |  |  |  |  |  |  |
| - Nearshore springs (21) | 376.4±12.4 | 1.267±0.031 | 0.389±0.009 | 0.280±0.022 | 0.011±0.003 | 0.799±0.025 | 0.351±0.048 |
| - Middle springs (23) | 381.5±14.3 | 1.264±0.043 | 0.387±0.010 | 0.283±0.026 | *0.008±0.002* | 0.817±0.064 | 0.377±0.100 |
| - Offshore springs (21) | **383.9±14.7** | **1.305±0.024** | 0.381±0.013 | *0.260±0.010* | 0.009±0.003 | **0.842±0.033** | *0.306±0.041* |
| Beach porewater (2) | 357±14.3 | *1.062±0.020* | 0.414±0.032 | **0.400±0.004** | 0.016±0.001 | 0.833±0.002 | 0.586±0.026 |
| Tidal porewater (5) | 376.3±13.3 | 1.187±0.074 | 0.409±0.025 | 0.320±0.043 | 0.011±0.006 | 0.780±0.032 | 0.464±0.106 |
| Lake (1) | 372.1 | 1.148 | **0.460** | 0.327 | *0.008* | *0.666* | **0.537** |
| Seawater (2) | *337.4±2.*4 | 1.257±0.001 | *0.375±0.001* | 0.298±0.003 | **0.023±0.001** | 0.672±0.009 | 0.442±0.014 |

**Supplementary Table 3:** Distribution of molecular DOM parameters through the campaigns in the different locations (cont’d). For each campaign, maximum values are in bold, and minimum values are italic. S/C*1000 is a molecular sulfur ratio multiplied by 1000 for better visualization (Pohlabeln et al., 2017). Compound classes (e.g. aromatic, highly unsaturated, unsaturated, unsaturated with N, and saturated) are in % contribution based on intensity-weighed molecular formulae. NA= not sampled.

| **Campaign** | **S/C*1000** | **Aromatic** | **Highly unsaturated** | **Unsaturated** | **Unsaturated with N** | **Saturated** |
| --- | --- | --- | --- | --- | --- | --- |
| **June 2018** |  |  |  |  |  |  |
| - Nearshore springs (0) | NA | NA | NA | NA | NA | NA |
| - Middle springs (0) | NA | NA | NA | NA | NA | NA |
| - Offshore springs (4) | 3.049±0.452 | 3.2±1.9 | 82.7±1.3 | 12.5±2.1 | 0.3±0.2 | 0.9±1.0 |
| **August 2018** |  |  |  |  |  |  |
| - Nearshore springs (0) | NA | NA | NA | NA | NA | NA |
| - Middle springs (0) | NA | NA | NA | NA | NA | NA |
| - Offshore springs (9) | 3.282±1.768 | 4.6±2.5 | 81.5±4.2 | 13.0±2.6 | 0.7±0.8 | 0.3±0.1 |
| **February 2019** |  |  |  |  |  |  |
| - Nearshore springs (5) | 2.991±0.319 | 6.4±0.8 | 84.2±0.9 | 8.8±1.2 | 0.2±0.04 | *0.2±0.1* |
| - Middle springs (11) | 3.251±0.284 | 3.3±2.4 | 84.2±3.8 | 11.6±4.1 | **0.9±2.0** | 0.4±0.3 |
| - Offshore springs (18) | 2.928±0.368 | 2.4±0.9 | **84.8±2.4** | 11.6±1.8 | 0.6±1.0 | **0.5±0.4** |
| Beach porewater (3) | *2.122±0.581* | 17.3±9.0 | 77.0±7.1 | *5.3±2.5* | *0.1±0.02* | 0.3±0.1 |
| Tidal porewater (13) | 3.005±0.812 | *2.8±2.4* | 82.9±4.7 | 13.3±4.6 | 0.4±0.2 | **0.5±0.7** |
| Lake (2) | 2.258±0.380 | **12.3±0.3** | *72.4±0.9* | **15±0.4** | 0.2±0.04 | *0.2±0.2* |
| Seawater (4) | **4.233±0.200** | 11.6±0.9 | 75.5±3.1 | 12.4±2.4 | 0.8±0.2 | 0.4±0.4 |
| **March 2019** |  |  |  |  |  |  |
| Weser (3) | *3.733±0.159* | **12.1±2.7** | *81.4±1.6* | *6.5±1.2* | **0.4±0.2** | 0 |
| Elbe (3) | **3.998±0.232** | *11.3±1.0* | **82±0.9** | **6.7±0.3** | *0.3±0.1* | 0 |
| **November 2019** |  |  |  |  |  |  |
| - Nearshore springs (25) | 2.549±0.310 | 6.1±4.7 | 82.1±4.5 | 10.9±1.1 | 0.5±0.3 | 0.3±0.1 |
| - Middle springs (12) | 2.188±0.494 | *1.9±0.5* | **85.7±2.4** | 11.6±2.1 | **1.1±0.7** | 0.2±0.07 |
| - Offshore springs (25) | 2.190±0.642 | 3.2±2.5 | 85.4±2.6 | 10.5±1.1 | 0.7±0.5 | 0.3±0.2 |
| Beach porewater (2) | 2.143±0.351 | 12.9±2.1 | 75.8±2.9 | 10.3±0.8 | 0.2±0.1 | **0.4±0.1** |
| Lake (1) | 2.781 | 11.8 | 67.1 | **20.6** | 0.4 | 0.2 |
| Seawater (2) | **3.563±0.540** | 12.9±5.2 | 76.6±4 | 10.1±1.0 | 1.0±0.2 | 0.2±0.2 |
| Sahlenburg Well (1) | 3.059 | 7.4 | 86.0 | 6.5 | 0.2 | 0.0 |
| Spieka Well (2) | *1.355±0.522* | **30.3±0.9** | *64±0.3* | *5.5±0.6* | *0.1±0.01* | *0.1±0.004* |
| Water channel (1) | 2.452 | 4.3 | 84.5 | 10.4 | 0.5 | 0.2 |
| **July 2020** |  |  |  |  |  |  |
| - Nearshore springs (21) | 2.894±0.379 | 6.4±3.6 | 80.7±3.6 | 12.1±2.8 | 0.7±0.8 | 0.3±0.1 |
| - Middle springs (23) | 2.679±0.900 | 6.2±4.7 | 81.1±4.3 | 11.8±2.3 | 0.7±1.1 | 0.4±0.3 |
| - Offshore springs (21) | 2.243±0.392 | *3.0±2.0* | **81.5±5.0** | 14.4±3.2 | **2.0±1.6** | **0.5±0.5** |
| Beach porewater (2) | *2.058±1.275* | **28.7±1.0** | *66.4±1.9* | *4.6±0.9* | 0.4±0.5 | *0.2±0.1* |
| Tidal porewater (5) | 2.709±0.759 | 13.9±8.7 | 76.8±6.8 | 8.9±2.8 | *0.3±0.4* | *0.2±0.1* |
| Lake (1) | 2.185 | 16.3 | 74.0 | 9.5 | *0.3* | *0.2* |
| Seawater (2) | **3.502±0.262** | 12.7±0.4 | 68.8±0.1 | **17.9±0.6** | 1.1±0.1 | *0.2±0.02* |

**
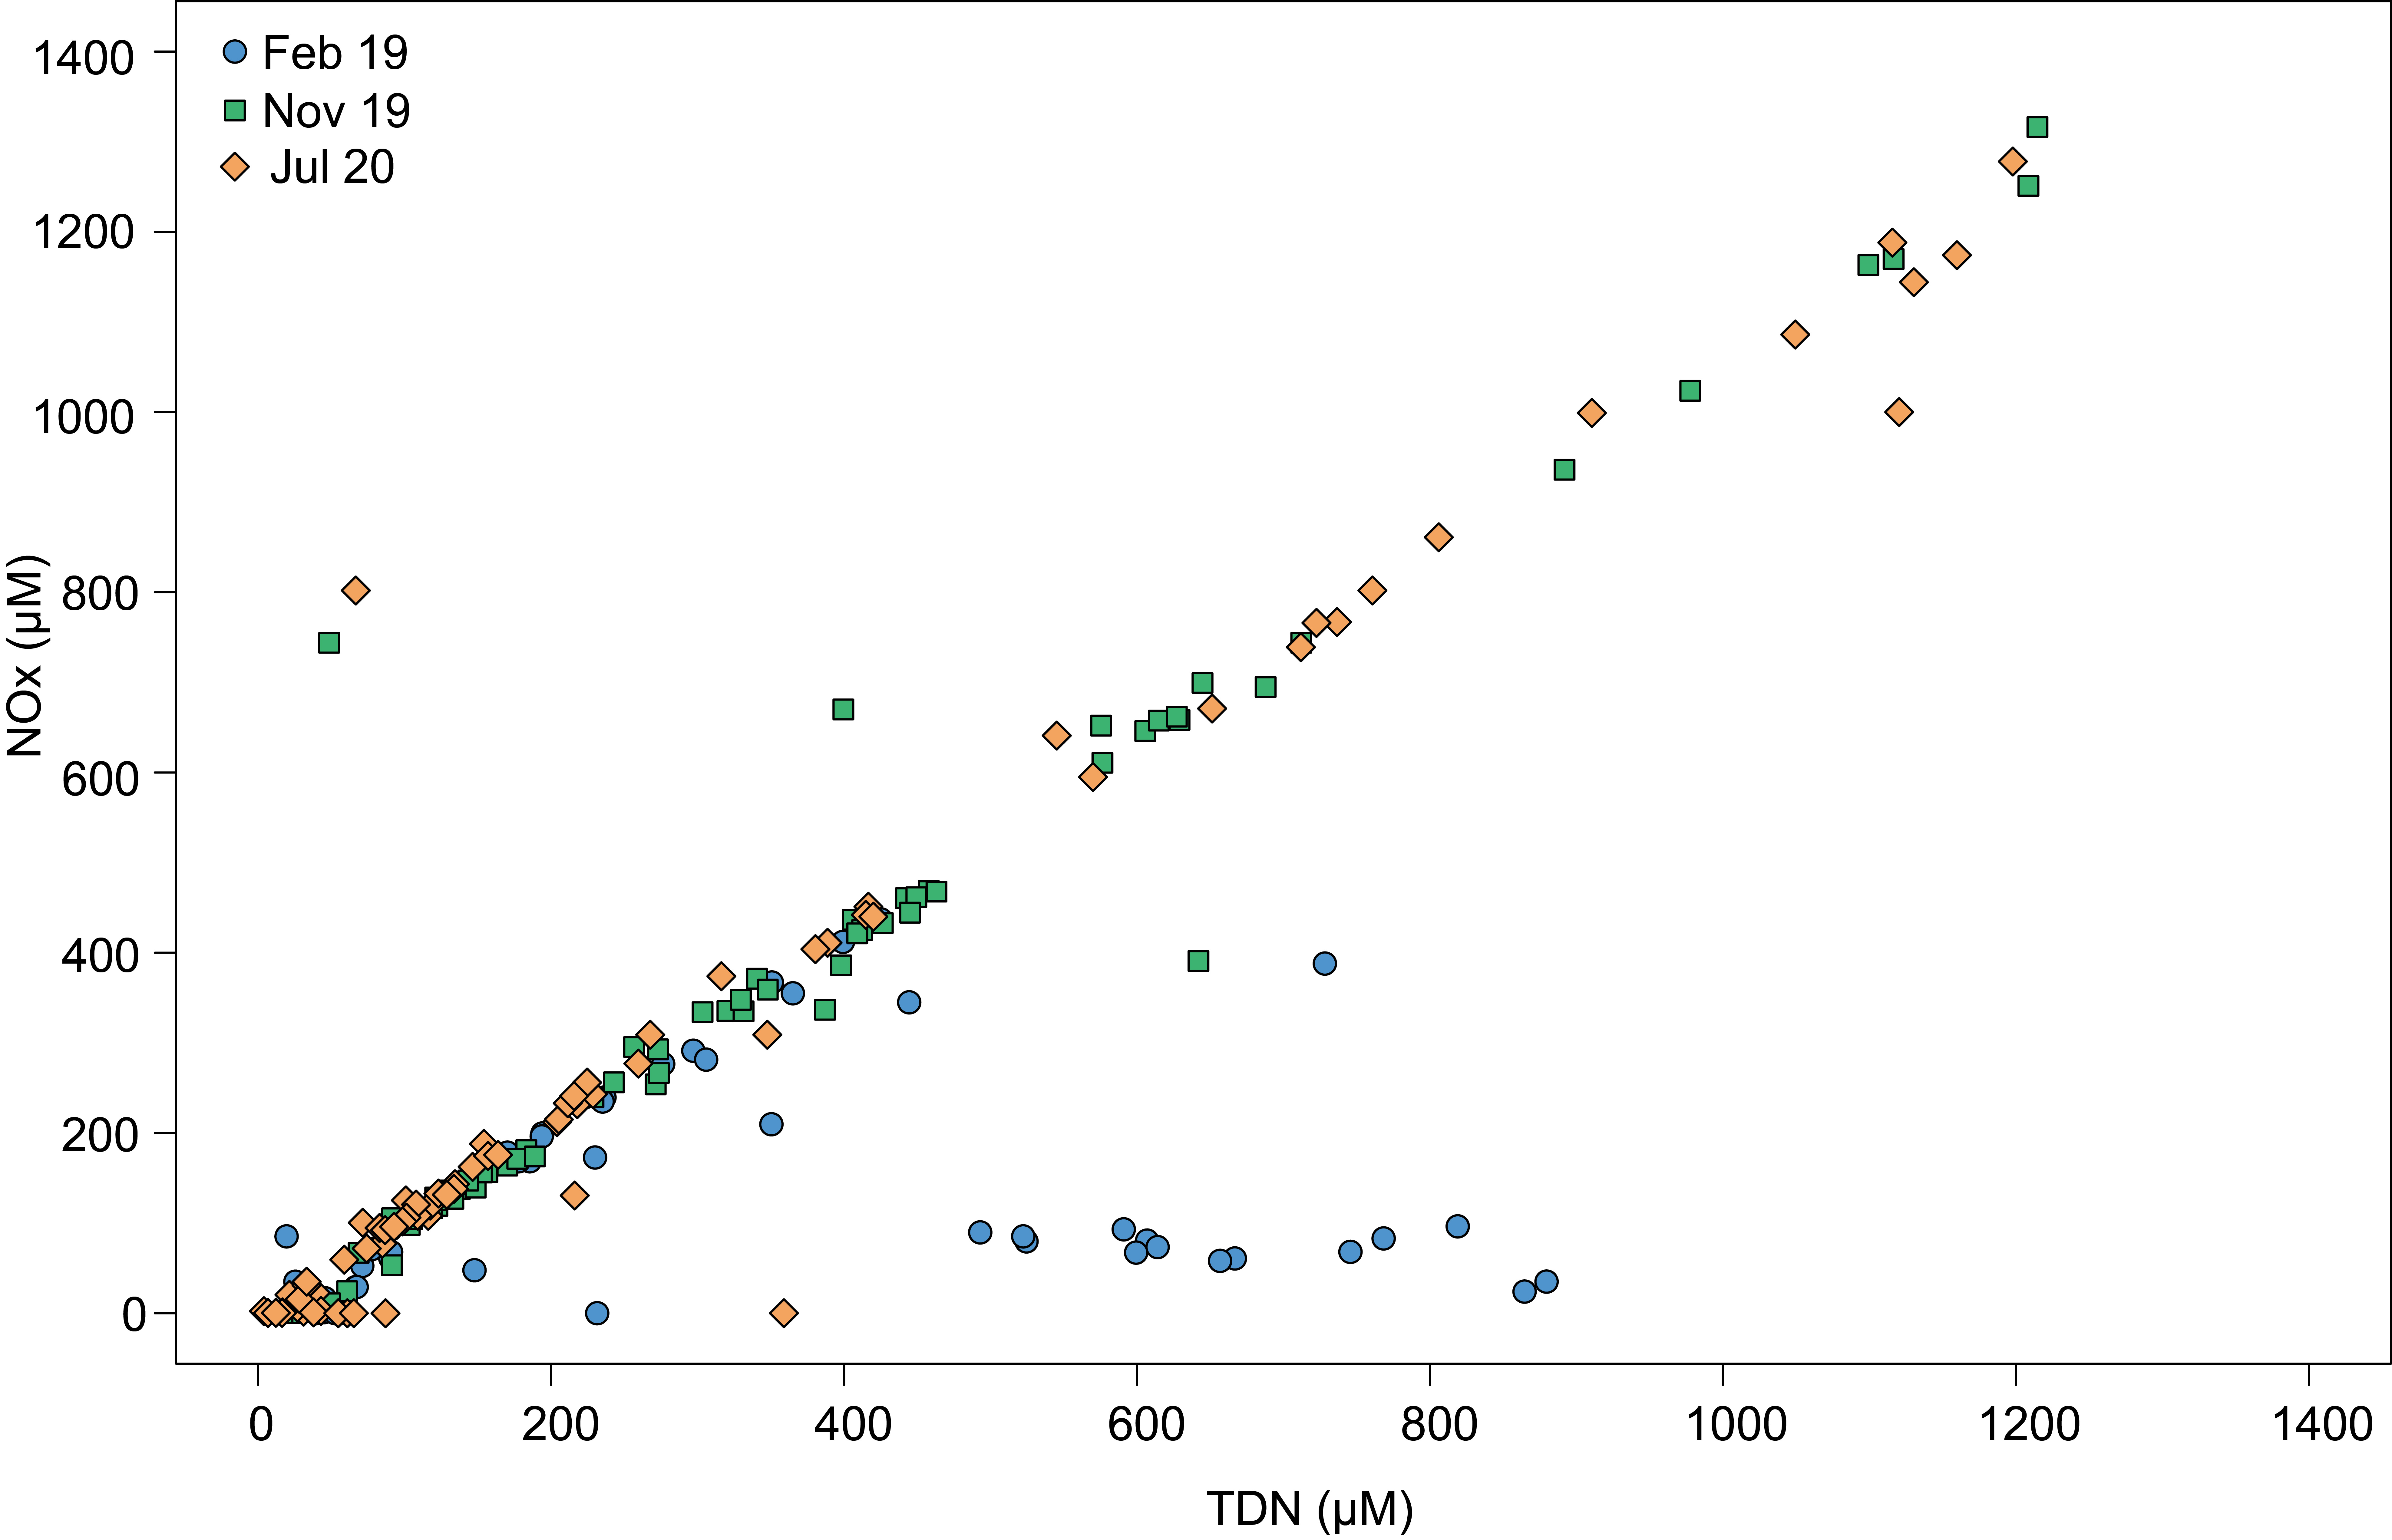
**

Supplementary Figure 1: TDN vs NOx for all sample types. Feb 19 samples were stored frozen, Nov 19 and Jul 20 samples were poisoned with HgCl2 and stored in the fridge.


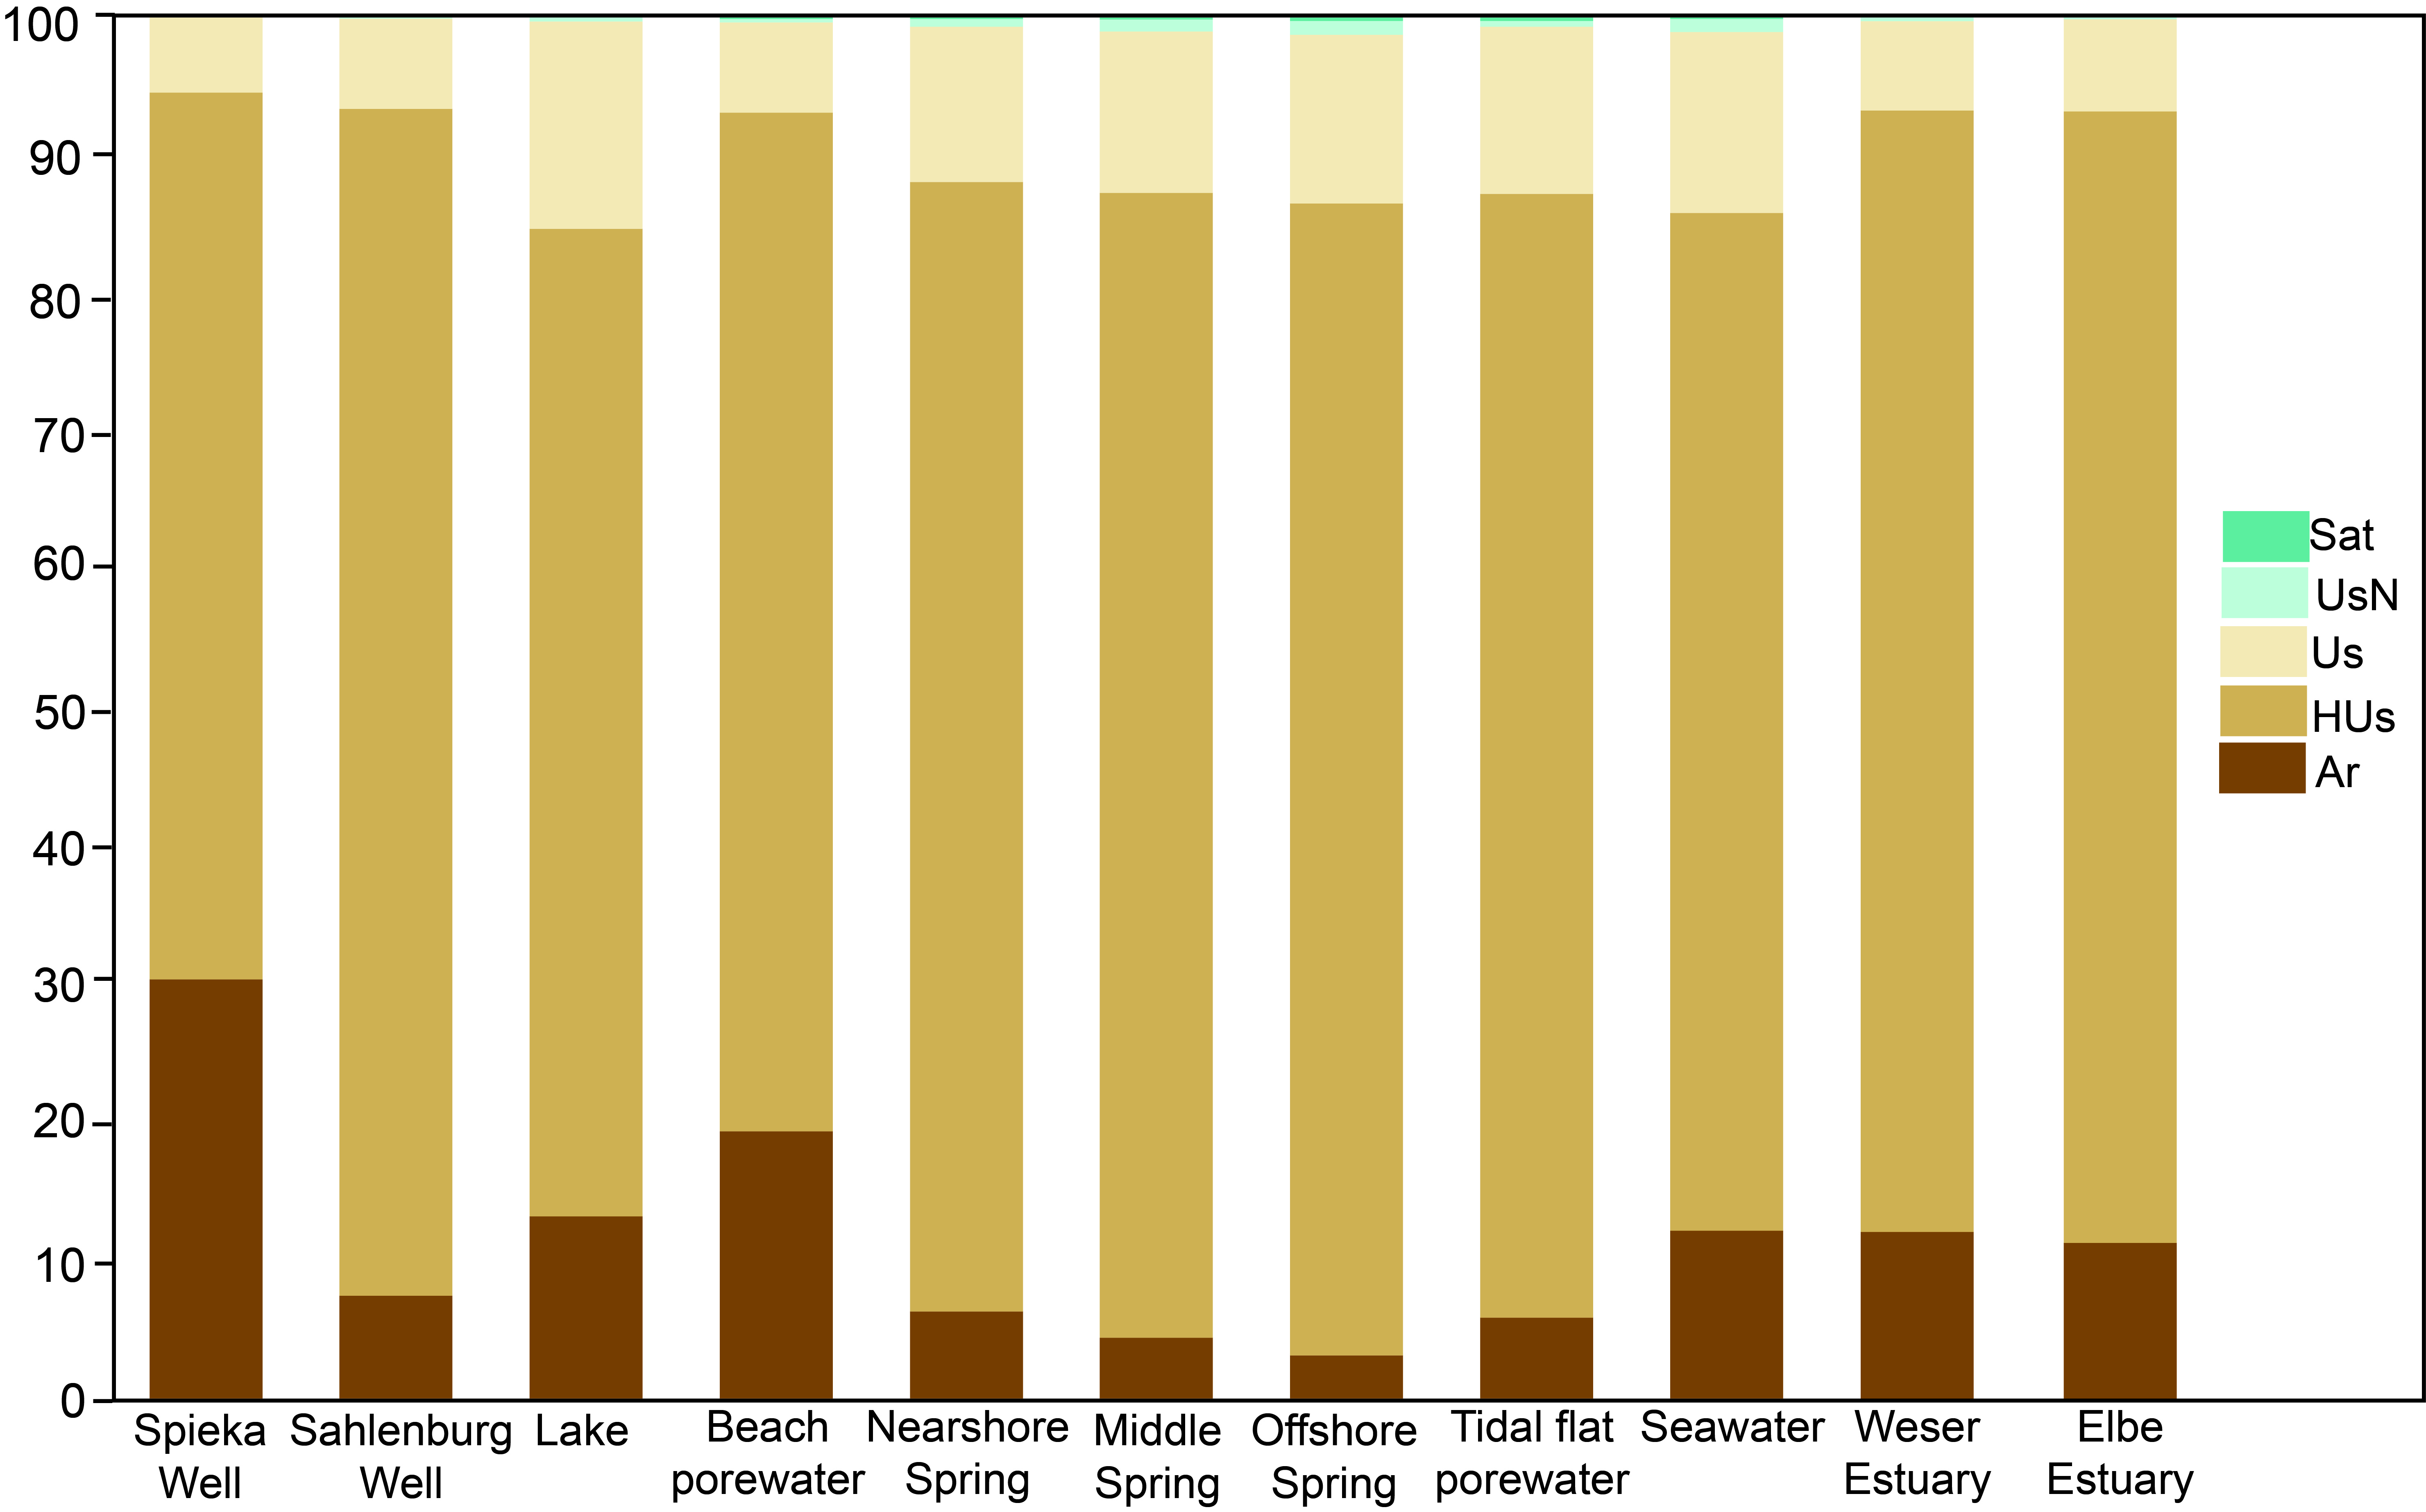


**Supplementary Figure 2:** DOM compound group distribution amongst different endmembers, all campaigns combined.

**
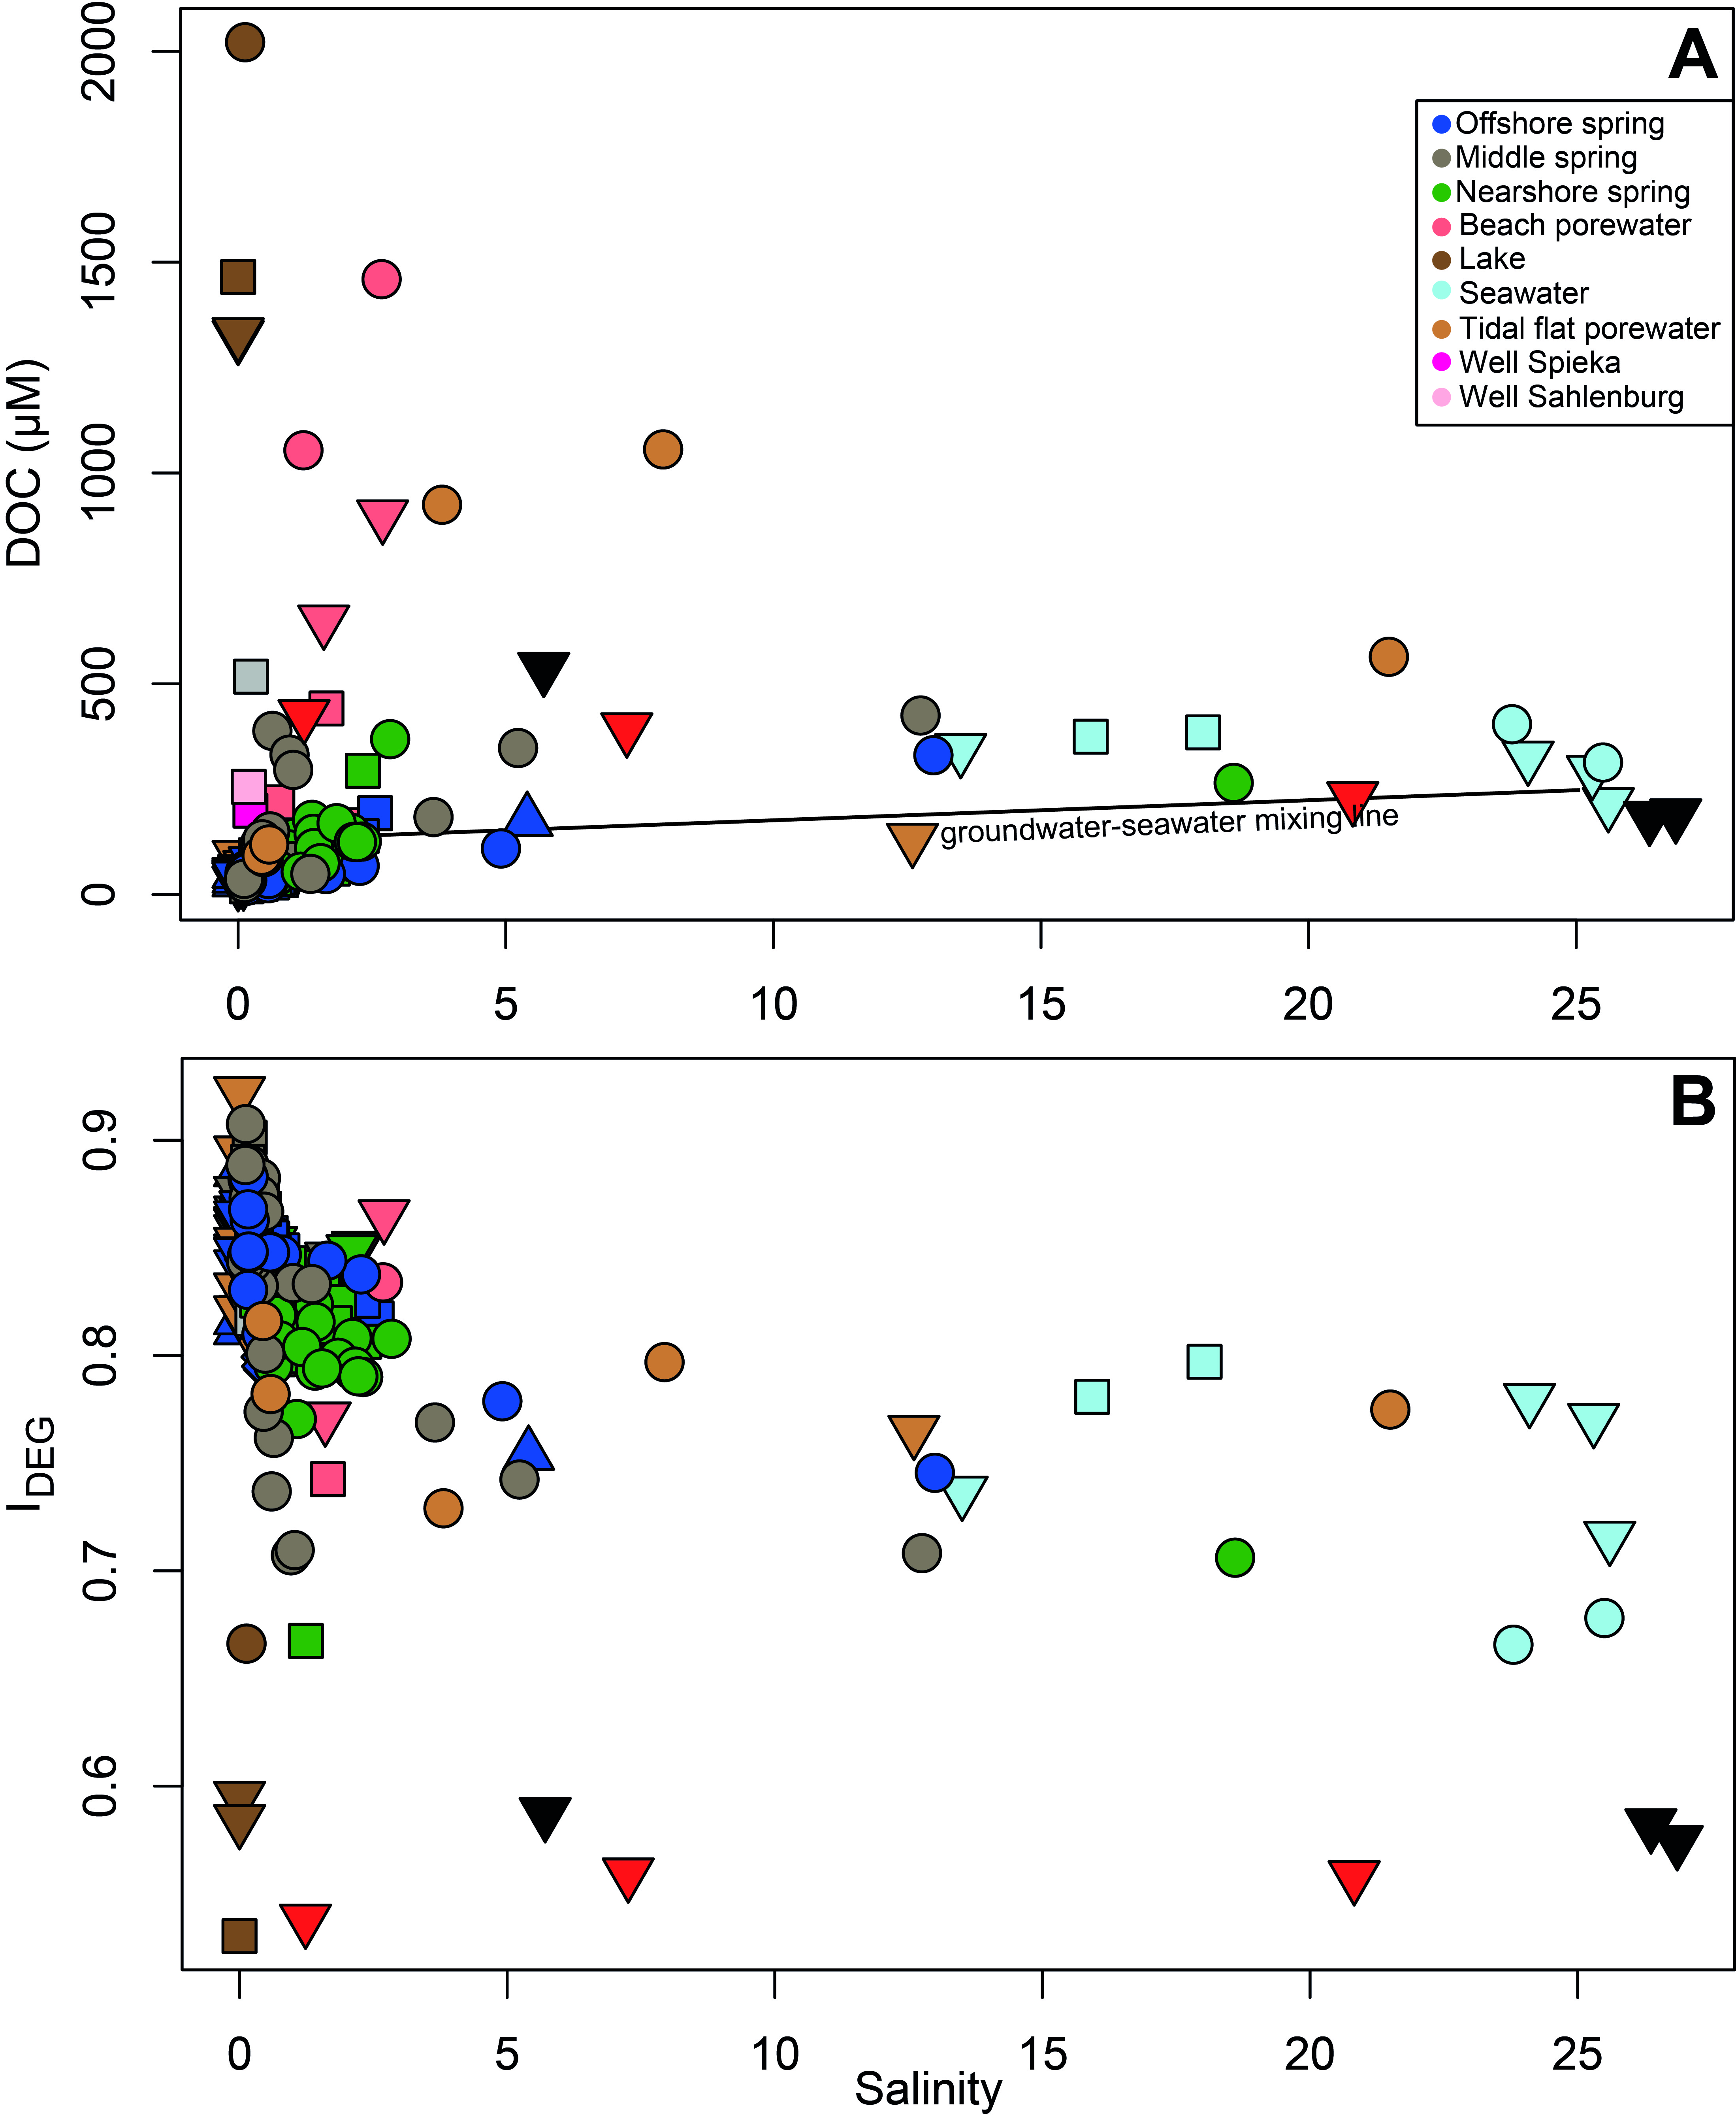
**

**Supplementary Figure 3:** Scatter plots of salinity *vs.* DOC concentrations (A) and IDEG (B) for all sampling campaigns and all endmembers. The groundwater-seawater mixing line was plotted between the Sahlenburg and Spieka wells and the seawater samples with the highest salinities, respectively.
